# Supplementary material
Source: HighWire-hosted journal article supplement (https://bmjopen.bmj.com/content/10/8/e039353)
Supplement: inline-supplementary-material-1 [file inline-supplementary-material-1.pdf]

**Supplementary Table 1 Sri Lankan Cerebral Palsy Register Data Fields**

| Variable                    |                                                                                                                                                                                                                        |
|-----------------------------|------------------------------------------------------------------------------------------------------------------------------------------------------------------------------------------------------------------------|
| Site of data collection     | Lady Ridgeway Hospital for Children- Colombo<br>Colombo South Teaching Hospital<br>North Colombo Teaching Hospital<br>Ragama Rehabilitation Hospital<br>Ayati / Faculty of Medicine / Ragama<br>Community Surveillance |
| Sex/Gender                  | Male<br>Female                                                                                                                                                                                                         |
| Province                    | Central<br>Eastern<br>North Central<br>Northern<br>North Western<br>Sabaragamuwa<br>Southern<br>Uva<br>Western                                                                                                         |
| Accommodations              | Private Residence<br>Psychiatric Residence<br>Aged care services<br>Alcohol drug Centres<br>Mental health community based support<br>Domestic service support centre<br>Unknown                                        |
| Number of household members | Number                                                                                                                                                                                                                 |
| Number of household rooms   | Number                                                                                                                                                                                                                 |
| Source of drinking water    | Tap water<br>Tube well<br>Well<br>Other – note in comments<br>Unknown                                                                                                                                                  |
| Sanitation                  | Sanitary latrine<br>Non- sanitary latrine<br>No toilet<br>Unknown                                                                                                                                                      |
| Monthly family income       | In Sri Lankan rupees                                                                                                                                                                                                   |
| Place of birth              | Hospital/ Birth center attached to the hospital- Name of the hospital<br>Home birth planned<br>Born outside home or hospital without medical assistance<br>Unknown                                                     |
| Province born               | Eastern<br>Northern<br>Southern<br>Western                                                                                                                                                                             |

|                                                |                                                                                                                                                                                                      |
|------------------------------------------------|------------------------------------------------------------------------------------------------------------------------------------------------------------------------------------------------------|
|                                                | North Central<br>Central<br>North western<br>Uva<br>Sabaragamuwa<br>Unknown                                                                                                                          |
| Level of care of facility at birth             | Home or hospital without neonatal intensive care unit or special care nursery<br>Hospital with special care nursery<br>Hospital with neonatal intensive care unit or special care nursery<br>Unknown |
| Admitted to neonatal or special care           | No<br>Yes- NICU<br>Yes- Special care<br>Yes- NICU and Special care<br>Unknown                                                                                                                        |
| MRI completed                                  | Yes<br>No<br>Unknown                                                                                                                                                                                 |
| Age at MRI completed                           | Neonatal (<28 days)<br>In neonatal 28 days and prior to 2 years<br>Beyond 2 years                                                                                                                    |
| MRI Findings                                   | Normal<br>Abnormal<br>Unknown                                                                                                                                                                        |
| General Movements Assessments, Writhing period | Normal<br>Poor repertoire<br>Cramped-synchronised<br>Chaotic<br>Not assessed<br>Unknown                                                                                                              |
| General Movements Assessments Fidgety period   | Normal<br>Abnormal<br>Absent<br>Not assessed<br>Unknown                                                                                                                                              |
| Plurality of birth                             | Singleton<br>Twins<br>Triplets<br>Quadruplets<br>Quintuplets<br>Sextuplets<br>Other – note in comments<br>Unknown                                                                                    |
| Birth Order                                    | Singleton or first of a multiple birth<br>Second of a multiple birth<br>Third of a multiple birth<br>Fourth of a multiple birth<br>Fifth of a multiple birth<br>Sixth of a multiple birth            |

|                                                                                 |                                                                                                                                                           |
|---------------------------------------------------------------------------------|-----------------------------------------------------------------------------------------------------------------------------------------------------------|
|                                                                                 | Other – note in comments<br>Unknown                                                                                                                       |
| Birth weight                                                                    | Birth weight in grams                                                                                                                                     |
| Gestational age                                                                 | Number of weeks gestation                                                                                                                                 |
| Mode of delivery                                                                | Vaginal Delivery<br>Vaginal Delivery requiring forceps<br>Vaginal Delivery requiring vacuum delivery<br>Unknown<br>Breach<br>Caesarian section<br>Unknown |
| Delivery attended by                                                            | Doctor and midwife<br>Midwife<br>Doctor<br>Skilled birth attendant<br>Family member<br>Unknown                                                            |
| Signs of birth asphyxia ( e.g. weak breathing, cyanosis, bradycardia)           | Yes – note in comments<br>No<br>Unknown                                                                                                                   |
| Complications during child birth/ labour                                        | No<br>Obstructed<br>Malpresentation<br>Pre – eclampsia<br>Haemorrhage<br>Premature rupture of membrane<br>Prolonged labour<br>Other – note in comments    |
| Live births to mother prior to this birth                                       | Number                                                                                                                                                    |
| Still births prior to this birth                                                | Number                                                                                                                                                    |
| Miscarriages prior to this birth                                                | Number                                                                                                                                                    |
| Mother experienced febrile illness during pregnancy                             | Yes<br>No<br>Unknown                                                                                                                                      |
| Mother received antenatal care during pregnancy                                 | Yes<br>No<br>Unknown                                                                                                                                      |
| Mother received nutritional supplements during pregnancy (e.g. folic acid/iron) | Yes<br>No<br>Unknown                                                                                                                                      |
| Maternal malnourishment                                                         | Yes – note in comments<br>No<br>Unknown                                                                                                                   |
| Exposure to toxins during pregnancy                                             | Yes – note in comments<br>No                                                                                                                              |

|                                                                     |                                                                                                                                                                                                                                                                                                                                                                                      |
|---------------------------------------------------------------------|--------------------------------------------------------------------------------------------------------------------------------------------------------------------------------------------------------------------------------------------------------------------------------------------------------------------------------------------------------------------------------------|
|                                                                     | Unknown                                                                                                                                                                                                                                                                                                                                                                              |
| Consanguinity                                                       | Yes – note in comments<br>No<br>Unknown                                                                                                                                                                                                                                                                                                                                              |
| Presence of other family members with disability                    | Yes – note in comments<br>No<br>Unknown                                                                                                                                                                                                                                                                                                                                              |
| Age at time of initial diagnosis                                    | _years, _months                                                                                                                                                                                                                                                                                                                                                                      |
| Predominant motor type at initial diagnosis                         | R/Spastic Hemi/monoplegia<br>L/Spastic Hemi/monoplegia<br>Hemi/Monoplegia side not specified<br>Spastic Diplegia<br>Spastic Triplegia<br>Spastic Quadriplegia<br>Ataxia<br>Dyskinesia – mainly athetoid<br>Dyskinesia – mainly dystonic<br>Hypotonic CP<br>Unknown<br>Not stated                                                                                                     |
| Severity as described by (GMFCS Level at time of initial diagnosis) | I<br>II<br>III<br>IV<br>V<br>Unknown                                                                                                                                                                                                                                                                                                                                                 |
| Predominant Motor type at the age of 5 years                        | R/Spastic Hemi/monoplegia<br>L/Spastic Hemi/monoplegia<br>Hemi/Monoplegia side not specified<br>Spastic Diplegia<br>Spastic Triplegia<br>Spastic Quadriplegia<br>Ataxia<br>Dyskinesia – mainly athetoid<br>Dyskinesia – mainly dystonic<br>Hypotonic CP<br>Not stated<br>Unknown<br>NA_CP resolved by age 5<br>NA_Known Syndrome not CP<br>NA_Unknown Syndrome not CP<br>Under age 5 |
| Secondary Motor Type of CP at the age of 5 years                    | R/Spastic Hemi/monoplegia<br>L/Spastic Hemi/monoplegia<br>Hemi/Monoplegia side not specified<br>Spastic Diplegia<br>Spastic Triplegia<br>Spastic Quadriplegia<br>Ataxia<br>Dyskinesia – mainly athetoid                                                                                                                                                                              |

|                                                             |                                                                                                                                                                                                                                                                                                                                                                                                                                                                                                                        |
|-------------------------------------------------------------|------------------------------------------------------------------------------------------------------------------------------------------------------------------------------------------------------------------------------------------------------------------------------------------------------------------------------------------------------------------------------------------------------------------------------------------------------------------------------------------------------------------------|
|                                                             | <p>Dyskinesia – mainly dystonic</p> <p>Hypotonic CP</p> <p>Not stated</p> <p>Unknown</p> <p>NA_CP resolved by age 5</p> <p>NA_Known Syndrome not CP</p> <p>NA_Unknown Syndrome not CP</p> <p>Under age 5</p>                                                                                                                                                                                                                                                                                                           |
| Severity described by GMFCS Levels at 5 years +             | <p>I</p> <p>II</p> <p>III</p> <p>IV</p> <p>V</p> <p>Unknown</p>                                                                                                                                                                                                                                                                                                                                                                                                                                                        |
| MACS Level at 4 years +                                     | <p>I</p> <p>II</p> <p>III</p> <p>IV</p> <p>V</p> <p>Unknown</p>                                                                                                                                                                                                                                                                                                                                                                                                                                                        |
| Pre/perinatal risk factors                                  | <p>Genetic/ Chromosomal – note in comments</p> <p>Intrauterine CMV infection</p> <p>Other intrauterine TORCH infection</p> <p>Vascular event</p> <p>Severe Jaundice in the neonatal period</p> <p>Low Birth Weight</p> <p>Prematurity</p> <p>Other – note in comments</p>                                                                                                                                                                                                                                              |
| Other pre/perinatal risk factors                            | <p>Infant malnourishment</p> <p>Hypoxic Ischemic Encephalopathy</p> <p>Neonatal meningitis</p> <p>Neonatal sepsis</p> <p>Neonatal polycythemia</p> <p>Neonatal anaemia</p> <p>Neonatal hypoperfusion</p> <p>Neonatal electrolyte imbalance regarding anomalies</p> <p>Sodium imbalance</p> <p>Neonatal seizures</p> <p>Other – note in comments</p>                                                                                                                                                                    |
| Post-neonatal causes (after 28 days and before 2 years age) | <p>Dehydration due to gastroenteritis</p> <p>Other bacterial infection</p> <p>Other viral infection</p> <p>Infection not otherwise specified</p> <p>Head injury - motor vehicle accident – passenger in vehicle</p> <p>Head injury - motor vehicle accident – pedestrian</p> <p>Head injury - fall</p> <p>Head-injury - non-accidental</p> <p>Head injury - other – note in comments</p> <p>Cerebrovascular accident associated with surgery</p> <p>Cerebrovascular accident associated with cardiac complications</p> |

|                                               |                                                                                                                                                                                                       |
|-----------------------------------------------|-------------------------------------------------------------------------------------------------------------------------------------------------------------------------------------------------------|
|                                               | Cerebrovascular accident spontaneous / Other<br>Near drowning<br>Apparent – life threatening event<br>Post seizure<br>Peri – operative hypoxia<br>Neonatal injury<br>Other – note in comments         |
| Any other associated syndrome                 | Yes – note in comments<br>No<br>Unknown                                                                                                                                                               |
| Birth defects – major categories              | Yes<br>- Nervous System<br>- Urogenital<br>- Musculoskeletal<br>- Cardiovascular<br>- Gastrointestinal<br>- Chromosomal<br>- Respiratory<br>- Metabolic<br>- Heamatological/ Immune<br>No<br>Unknown  |
| Epilepsy at 5 years +                         | Yes<br>No<br>Unknown                                                                                                                                                                                  |
| Intellectual impairment at the age of 5 years | Normal IQ > 70<br>Mild impairment IQ 50 – 69<br>Moderate impairment 35-49<br>Severe impairment IQ < 35<br>Probably greater than borderline impairment<br>Probably borderline/no impairment<br>Unknown |
| Visual Impairment at the age 5 years          | No impairment<br>Some visual impairment<br>Functionally blind<br>Unknown                                                                                                                              |
| Strabismus status at the age of 5 years       | Yes<br>No<br>Unknown                                                                                                                                                                                  |
| Hearing impairment at the age of 5 years      | No<br>Some impairment<br>Bilateral Deafness<br>Unknown                                                                                                                                                |
| Speech at the age of 5 years                  | No<br>Some impairment<br>Non-Verbal<br>Unknown                                                                                                                                                        |
| VIKING Level at the age of 5 years            | I<br>II<br>III                                                                                                                                                                                        |

|                                                                               |                                                                                                                          |
|-------------------------------------------------------------------------------|--------------------------------------------------------------------------------------------------------------------------|
|                                                                               | IV<br>Unknown                                                                                                            |
| Communication Functional Classification System ( CFCS > 4 years )             | I<br>II<br>III<br>IV<br>V<br>Unknown                                                                                     |
| Functional Communication Classification System (FCCS>4 years)                 | I<br>II<br>III<br>IV<br>V<br>Unknown                                                                                     |
| Immunization ( Child fully immunized)                                         | Yes<br>No<br>Unknown                                                                                                     |
| Early feeding difficulties in first month of life                             | Yes<br>No<br>Unknown                                                                                                     |
| Gastro esophageal reflux                                                      | Yes<br>No<br>Unknown                                                                                                     |
| Eating or drinking at the age of 5 years                                      | Standard meals<br>Modified diet<br>Unable to eat or drink orally                                                         |
| Number of hospitalization for chest / respiratory infections in past 6 months | Enter number                                                                                                             |
| Received rehabilitation in last 2 years                                       | No<br>Unknown<br>Assistive device<br>Surgery<br>Advice<br>Therapy<br>Other – or more than one service – note in comments |
| Place of receiving services                                                   | Home based<br>Hospital<br>Not for profit<br>Private sector                                                               |
| Type of Intervention                                                          | Active<br>Passive                                                                                                        |
